# Supplementary material for: Identification of the ancestral killer immunoglobulin-like receptor gene in primates
Source: Springer Nature journal article supplement (doi:10.1186/1471-2164-7-209), 2006-08-15

**Additional file 3. Domain-by-domain analyses of human KIR and LILR genes.**

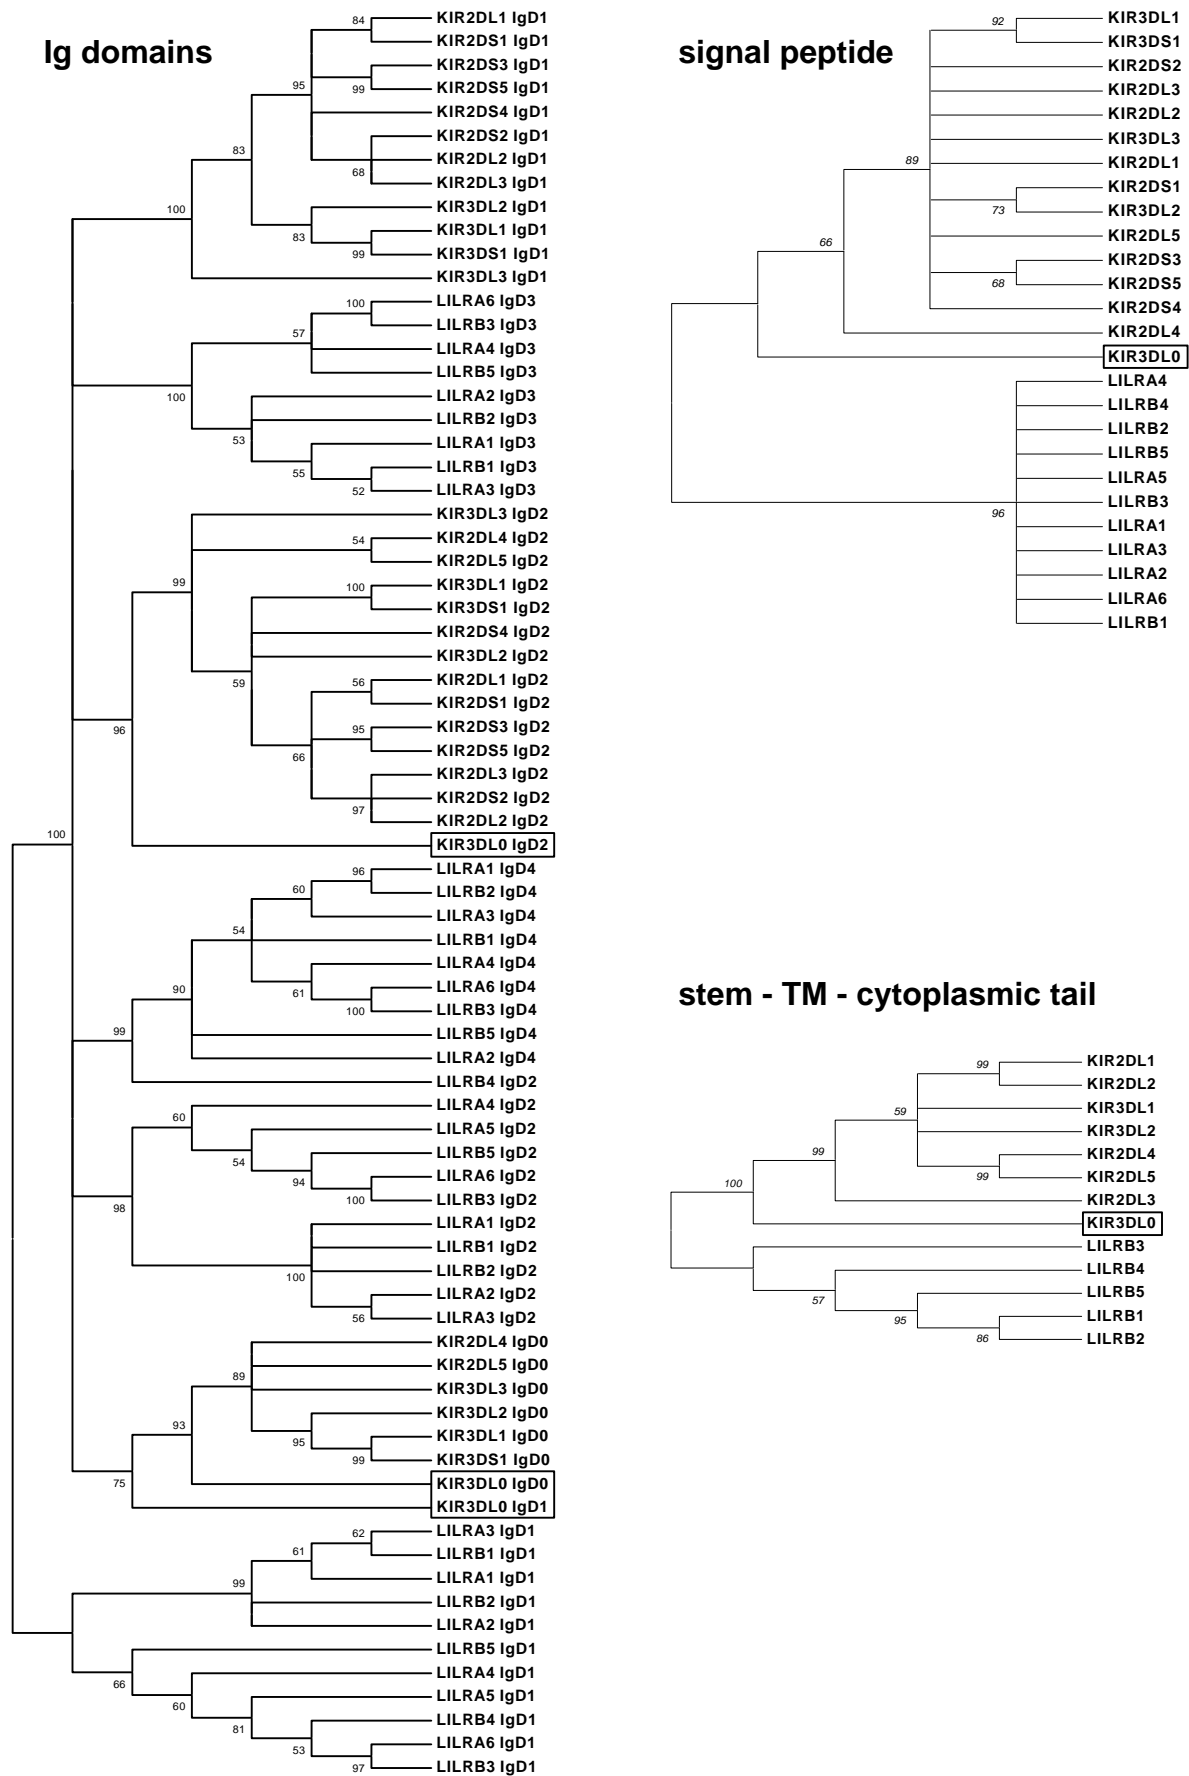

Supplement: Additional file 3 [file 1471-2164-7-209-s3.pdf]
